# Supplementary material
Source: PubMed Central journal article supplement (PMC5516478)
Supplement: NIHMS877828-supplement-Supporting_Information.pdf [file NIHMS877828-supplement-Supporting_Information.pdf]

## Supporting Information

### (-)-Neocaryachine, An Antiproliferative Pavine Alkaloid from *Cryptocarya laevigata* Induces DNA Double-strand Breaks

Yuki Suzuki,<sup>†</sup>, Yohei Saito,<sup>†</sup> Masuo Goto,<sup>‡,\*</sup> David J. Newman,<sup>§</sup> Barry R. O’Keefe,<sup>⊥,||</sup> Kuo-Hsiung Lee<sup>‡,∇,○</sup>  
and Kyoko Nakagawa-Goto<sup>†,‡,\*</sup>

<sup>†</sup>School of Pharmaceutical Sciences, College of Medical, Pharmaceutical and Health Sciences, Kanazawa University, Kanazawa, 920-1192, Japan

<sup>‡</sup>Natural Products Research Laboratories, UNC Eshelman School of Pharmacy, University of North Carolina at Chapel Hill, Chapel Hill, North Carolina 27599-7568, United States

<sup>§</sup>NIH Special Volunteer, Wayne, Pennsylvania 19087, United States

<sup>⊥</sup>Natural Products Branch, Developmental Therapeutics Program, Division of Cancer Treatment and Diagnosis, National Cancer Institute, NCI at Frederick, Frederick, Maryland 21702-1201, United States

<sup>||</sup>Molecular Targets Laboratory, Center for Cancer Research, National Cancer Institute, NCI at Frederick, Frederick, Maryland 21702-1201, United States

<sup>∇</sup>Lineberger Comprehensive Cancer Center, University of North Carolina at Chapel Hill, Chapel Hill, North Carolina 27599-7295, United States

<sup>○</sup> Chinese Medicine Research and Development Center, China Medical University and Hospital, 2 Yuh-Der Road, Taichung, 40447, Taiwan

## Table of Contents

|                                                                                                      |    |
|------------------------------------------------------------------------------------------------------|----|
| Figure S1. Human tumor cell line assay data for the crude organic extract of <i>L. corymbulosa</i> . |    |
| .....                                                                                                | S3 |
| Characterizations of all isolated alkaloids from the bark of <i>Cryptocarya laevigata</i> .....      | S3 |

**Table S1.** Human tumor cell line assay data for the crude organic extract of *L. corymbulosa*.

| Alkaloids | Cell lines <sup>a</sup> /IC <sub>50</sub> (μM) <sup>b</sup> |            |       |      |        |
|-----------|-------------------------------------------------------------|------------|-------|------|--------|
|           | A549                                                        | MDA-MB-231 | MCF-7 | KB   | KB-VIN |
| N025183   | 0.25                                                        | 0.23       | 0.49  | 0.64 | 0.37   |
| PXL (nM)  | 6.20                                                        | 8.82       | 10.40 | 6.27 | 1926   |

<sup>a</sup>A549 (lung carcinoma), MDA-MB-231 (triple-negative breast cancer), MCF-7 (estrogen receptor-positive & HER2-negative breast cancer), KB (epidermoid carcinoma of the nasopharynx), KB-VIN (P-gp-overexpressing MDR subline of KB). <sup>b</sup> Antiproliferative activity as IC<sub>50</sub> values for each cell line, the concentration of compound that caused 50% reduction relative to untreated cells determined by the SRB assay.

### Characterizations of all isolated alkaloids from the bark of *Cryptocarya laevigata*

(-)-*Neocaryachine* (**1**).  $[\alpha]_D^{26}$  -199 (*c* 0.05, MeOH); <sup>1</sup>H-NMR (CDCl<sub>3</sub>, 600 MHz) δ 2.53 (s, 3H, N-CH<sub>3</sub>), 2.59 (d, *J* = 16.1 Hz, 1H, H-11β), 2.72 (d, *J* = 16.5 Hz, 1H, H-5β), 3.31 (dd, *J* = 16.5, 5.8 Hz, 1H, H-5α), 3.37 (dd, *J* = 16.1, 5.7 Hz, 1H, H-11α), 3.83 (s, 3H, 8-OMe), 3.98 (d, *J* = 5.7 Hz, 1H, H-12), 4.34 (d, *J* = 5.8 Hz, 1H, H-6), 5.69 (brs, 1H, 7-OH), 5.80 (d, *J* = 1.4 Hz, 1H, 2,3-OCH<sub>2</sub>O-), 5.85 (d, *J* = 1.4 Hz, 1H, 2,3-OCH<sub>2</sub>O-), 6.43 (s, 1H, H-4), 6.50 (d, *J* = 8.1 Hz, 1H, H-10), 6.58 (s, 1H, H-1), 6.66 (d, *J* = 8.1 Hz, 1H, H-9); <sup>13</sup>C-NMR (CDCl<sub>3</sub>, 150 MHz) : δ 31.6 (C-5), 33.0 (C-11), 40.9 (N-CH<sub>3</sub>), 51.6 (C-6), 56.2 (8-OMe), 56.8 (C-12), 100.6 (2,3-OCH<sub>2</sub>O-), 107.2 (C-1), 108.9 (C-4), 109.3 (C-9), 119.7 (C-10), 124.5 (C-6a), 125.4 (C-10a), 126.3 (C-4a), 130.0 (C-12a), 142.0 (C-7), 144.3 (C-8), 145.9 (C-2), 146.3 (C-3); HRMS *m/z* 326.1412 [M+H]<sup>+</sup>

(-)-*Isocaryachine* (**2**).  $[\alpha]_D^{29}$  -201.9 (*c* 0.34, EtOH); <sup>1</sup>H-NMR (CDCl<sub>3</sub>, 600 MHz) δ 2.51 (s, 3H, N-CH<sub>3</sub>), 2.52 (d, *J* = 16.4 Hz, 1H, H-11β), 2.55 (d, *J* = 17.0 Hz, 1H, H-5β), 3.34 (dd, *J* = 16.4, 5.8 Hz, 1H, H-11α), 3.38 (dd, *J* = 17.0, 5.8 Hz, 1H, H-5α), 3.85 (s, 3H, 8-OMe), 3.96 (d, *J* = 5.8 Hz, 2H, H-6, 12), 5.47 (brs, 1H, 9-OH), 5.81 (d, *J* = 1.5 Hz, 1H, 2, 3-OCH<sub>2</sub>O), 5.86 (d, *J* = 1.5 Hz, 1H, 2, 3-OCH<sub>2</sub>O-), 6.41 (s, 1H, H-4), 6.51 (s, 1H, H-10), 6.57 (s, 1H, H-7), 6.58 (s, 1H, H-1); <sup>13</sup>C-NMR (CDCl<sub>3</sub>, 150 MHz) δ 33.3 (C-11), 34.6 (C-5), 41.0 (N-CH<sub>3</sub>), 56.1 (C-6), 56.5 (8-OMe), 56.9 (C-12), 100.7 (2, 3-OCH<sub>2</sub>O-), 107.2 (C-1), 108.8 (C-4), 109.4 (C-7),

114.5 (C-10), 124.8 (C-10a), 125.1 (C-4a), 129.5 (C-6a), 131.4 (C-12a), 144.5 (C-9), 145.3 (C-8), 146.1 (C-2), 146.4 (C-3) FABMS  $m/z$  326.193 [M+H]<sup>+</sup>

(-)-*Crychine* (**3**).  $[\alpha]_D^{27}$  -214.9 ( $c$  2.98, EtOH); <sup>1</sup>H-NMR (CDCl<sub>3</sub>, 600 MHz)  $\delta$  2.50 (s, 3H, N-CH<sub>3</sub>), 2.53 (d,  $J$ =16.4 Hz, 2H, H-5 $\beta$ , H-11 $\beta$ ), 3.35 (dd,  $J$ =16.4, 5.8 Hz, 2H, H-5 $\alpha$ , H-11 $\alpha$ ), 3.94 (d,  $J$ =5.8 Hz, 2H, H-6, H-12), 5.80 (d,  $J$ =1.5 Hz, 2H, 2,3-OCH<sub>2</sub>O-, 8,9-OCH<sub>2</sub>O-), 5.85 (d,  $J$ =1.5 Hz, 2H, 2,3-OCH<sub>2</sub>O-, 8,9-OCH<sub>2</sub>O-), 6.41 (s, 2H, H-4, H-10), 6.57 (s, 2H, H-1, H-7); <sup>13</sup>C-NMR (CDCl<sub>3</sub>, 150 MHz)  $\delta$  34.1 (C-5, C-11), 40.9 (N-CH<sub>3</sub>), 56.7 (C-6, C-12), 100.7 (2,3-OCH<sub>2</sub>O-, 8,9-OCH<sub>2</sub>O-), 107.1 (C-1, C-7), 108.7 (C-4, C-10), 125.0 (C-4a, C-10a), 131.0 (C-6a, C-12a), 146.1 (C-2, C-8), 146.4 (C-3, C-9); FABMS  $m/z$  324.089 [M+H]<sup>+</sup>

(-)-*Eschscholtzine-N-oxide* (**4**).  $[\alpha]_D^{28}$  -26.0 ( $c$  0.14, MeOH); <sup>1</sup>H-NMR (CDCl<sub>3</sub>, 600 MHz)  $\delta$  2.68 (d,  $J$ =16.1 Hz, 1H, H-11 $\beta$ ), 3.05 (d,  $J$ =17.4 Hz, 1H, H-5 $\beta$ ), 3.37 (s, 3H, N-CH<sub>3</sub>), 3.51 (dd,  $J$ =17.4, 5.8 Hz, 1H, H-5 $\alpha$ ), 4.20 (dd,  $J$ =16.1, 5.3 Hz, 1H, H-11 $\alpha$ ), 4.46 (d,  $J$ =5.3 Hz, 1H, H-12), 4.54 (d,  $J$ =5.8 Hz, 1H, H-6), 5.87 (s, 2H, 8, 9-OCH<sub>2</sub>O-), 5.90 (d,  $J$ =1.4 Hz, 1H, 2, 3-OCH<sub>2</sub>O-), 5.94 (d,  $J$ =1.4 Hz, 1H, 2, 3-OCH<sub>2</sub>O-), 6.48 (s, 1H, H-4), 6.50 (s, 1H, H-10), 6.57 (s, 1H, H-7), 6.63 (s, 1H, H-1); FABMS  $m/z$  340.181 [M+H]<sup>+</sup>

(-)-*Norargemonine* (**5**).  $[\alpha]_D^{28}$  -159.6 ( $c$  0.01, CHCl<sub>3</sub>); <sup>1</sup>H-NMR (CDCl<sub>3</sub>, 600 MHz)  $\delta$  2.52 (s, 3H, N-CH<sub>3</sub>), 2.57 (dd,  $J$ =16.7, 5.5 Hz, 2H, H-5 $\beta$ /H-11 $\beta$ ), 3.30–3.50 (m, 2H, H-5 $\alpha$ /H-11 $\alpha$ ), 3.78 (s, 3H, 3-OCH<sub>3</sub>), 3.77 and 3.78 (each s, 3H, 3-OCH<sub>3</sub>/9-OCH<sub>3</sub>), 3.84 (s, 3H, 2-OCH<sub>3</sub>), 3.98 (t,  $J$ =5.5 Hz, 2H, H-6/H-12), 5.41 (s, 1H, 8-OH), 6.42 and 6.43 (each s, 1H, H-4/H-10), 6.60 (s, 1H, H-1), 6.68 (s, 1H, H-7); FABMS  $m/z$  342.208 [M+H]<sup>+</sup>

(-)-*Bisnorargemonine* (**6**).  $[\alpha]_D^{28}$  -54.1 ( $c$  0.025, MeOH); <sup>1</sup>H-NMR (CDCl<sub>3</sub>, 600 MHz)  $\delta$  2.51 (s, 3H, N-CH<sub>3</sub>), 2.54 (d,  $J$ =15.0 Hz, 1H, H-11 $\beta$ ), 2.56 (d,  $J$ =14.2 Hz, 1H, H-5 $\beta$ ), 3.34 (dd,  $J$ =15.0, 5.8 Hz, 1H, H-11 $\alpha$ ), 3.39 (dd,  $J$ =14.2, 6.1 Hz, 1H, H-5 $\alpha$ ), 3.78 (s, 3H, 3-OCH<sub>3</sub>), 3.85 (s, 3H, 8-OCH<sub>3</sub>), 3.96 (d,  $J$ =5.8 Hz, 1H, H-12), 3.97 (d,  $J$ =6.1 Hz, 1H, H-6), 5.39 and 5.41 (each br s, 1H, 2 and 9-OH), 6.42 (s, 1H, H-4), 6.51 (s, 1H, H-10), 6.58 (s, 1H, H-7), 6.67 (s, 1H, H-1); FABMS  $m/z$  328.234 [M+H]<sup>+</sup>

(-)-13 $\alpha$ -Antofine.  $[\alpha]_D^{27}$  -121.1 (*c* 0.05, CHCl<sub>3</sub>); <sup>1</sup>H-NMR (CDCl<sub>3</sub>, 600 MHz)  $\delta$  1.78 (m, 1H, H-13 $\beta$ ), 1.92 (m, 1H, H-12 $\alpha$ ), 2.04 (m, 1H, H-12 $\beta$ ), 2.25 (m, 1H, H-13 $\alpha$ ), 2.45 (q, *J* = 8.7 Hz, 1H, H-11 $\alpha$ ), 2.50 (m, 1H, H-13 $\alpha$ ), 2.90 (dd, *J* = 15.6, 10.6 Hz, 1H, H-14 $\beta$ ), 3.36 (dd, *J* = 15.6, 2.5 Hz, 1H, H-14 $\alpha$ ), 3.47 (dt, *J* = 8.7, 1.7 Hz, 1H, H-11 $\beta$ ), 3.71 (d, *J* = 14.6 Hz, 1H, H-9 $\alpha$ ), 4.02 (s, 3H, 6-OMe), 4.07 (s, 3H, 2-OMe), 4.11 (s, 3H, 3-OMe), 4.70 (d, *J* = 14.6 Hz, 1H, H-9 $\beta$ ), 7.21 (dd, *J* = 9.1, 2.7 Hz, 1H, H-7), 7.33 (s, 1H, H-1), 7.83 (d, *J* = 9.1 Hz, 1H, H-8), 7.91 (d, *J* = 2.7 Hz, 1H, H-5), 7.92 (s, 1H, H-4); <sup>13</sup>C-NMR (CDCl<sub>3</sub>, 150 MHz)  $\delta$  21.8 (C-12), 31.5 (C-13), 34.0 (C-14), 54.1 (C-9), 55.3 (6-OMe), 55.7 (C-11), 56.0 (2-OMe), 56.2 (3-OMe), 60.4 (C-13a), 104.0 (C-4), 104.1 (C-1), 104.8 (C-5), 115.0 (C-7), 123.7 (C-4a), 124.3 (C-8a), 124.4 (C-8), 125.7 (C-14a), 126.9 (C-8b), 127.3 (C-14b), 130.3 (C-4b), 148.5 (C-3), 149.5 (C-2), 157.6 (C-6); FABMS *m/z* 364.223 [M+H]<sup>+</sup>

(-)-*N*-demethylphyllocaryptine.  $[\alpha]_D^{27}$  -80.5 (*c* 0.06, CHCl<sub>3</sub>); <sup>1</sup>H-NMR (CDCl<sub>3</sub>, 600 MHz)  $\delta$  2.46 (s, 3H, N-CH<sub>3</sub>), 2.55 (dt, *J* = 16.1, 5.0 Hz, 1H, H-4<sub>eq</sub>), 2.70-3.00 (m, 3H, H-3<sub>eq</sub>, H- $\alpha$ , H-4<sub>ax</sub>), 3.01 (dd, *J* = 14.3, 6.3 Hz, 1H, H- $\alpha$ ), 3.15 (ddd, *J* = 14.0, 9.0, 5.0 Hz, 1H, H-3<sub>ax</sub>), 3.66 (t, *J* = 6.3 Hz, 1H, H-1), 3.87 (s, 3H, 4'-OMe), 5.54 (brs, 1H, 3'-OH), 5.85 (d, *J* = 1.5 Hz, 1H, 6,7-OCH<sub>2</sub>O-), 5.88 (d, *J* = 1.5 Hz, 1H, 6,7-OCH<sub>2</sub>O-), 6.27 (s, 1H, H-8), 6.53 (s, 1H, H-5), 6.59 (dd, *J* = 8.0, 2.1 Hz, 1H, H-6'), 6.74 (d, *J* = 8.0 Hz, 1H, H-5'), 6.77 (d, *J* = 2.1 Hz, 1H, H-2'); <sup>13</sup>C-NMR (CDCl<sub>3</sub>, 150 MHz)  $\delta$  25.8 (C-4), 41.2 (C- $\alpha$ ), 42.8 (N-CH<sub>3</sub>), 46.8 (C-3), 56.1 (4'-OMe), 65.3 (C-1), 100.6 (6,7-OCH<sub>2</sub>O-), 108.0 (C-8), 108.5 (C-5), 110.5 (C-5'), 115.7 (C-2'), 121.1 (C-6'), 127.4 (C-4a), 131.1 (C-8a), 133.5 (C-1'), 145.0 (C-4'), 145.4 (C-3'), 145.4 (C-7), 146.0 (C-6); FABMS *m/z* 328.221 [M+H]<sup>+</sup>

(+)-Cinnamolaurine.  $[\alpha]_D^{25}$  +78.9 (*c* 0.50, CHCl<sub>3</sub>); <sup>1</sup>H-NMR (CDCl<sub>3</sub>, 600 MHz)  $\delta$  2.47 (s, 3H, N-CH<sub>3</sub>), 2.52 (dt, *J* = 16.4, 5.0 Hz, 1H, H-4<sub>eq</sub>), 2.69-2.81 (m, 3H, H-3<sub>eq</sub>, H- $\alpha$ , H-4<sub>ax</sub>), 3.02 (dd, *J* = 14.3, 5.7 Hz, 1H, H- $\alpha$ ), 3.14 (ddd, *J* = 14.1, 8.5, 5.0 Hz, 1H, H-3<sub>ax</sub>), 3.64-3.68 (overlap, H-1), 5.85 (d, *J* = 1.5 Hz, 1H, 6, 7-

OCH<sub>2</sub>O-), 5.88 (d,  $J=1.5$  Hz, 1H, 6, 7-OCH<sub>2</sub>O-), 6.23 (s, 1H, H-8), 6.53 (s, 1H, H-5), 6.72 (d,  $J=8.6$  Hz, 2H, H-2', 6'), 6.98 (d,  $J=8.6$  Hz, 2H, H-3', 5'); FABMS  $m/z$  298.207 [M+H]<sup>+</sup>

(+)-*N*-demethylcoculaurine.  $[\alpha]^{23}_{\text{D}} +18.7$  ( $c$  0.05, CHCl<sub>3</sub>); <sup>1</sup>H-NMR (CDCl<sub>3</sub>, 600 MHz)  $\delta$  2.45 (s, 3H, N-CH<sub>3</sub>), 2.53 (dt,  $J = 15.1, 4.5$  Hz, 1H, H-4<sub>eq</sub>), 2.69-2.85 (m, 3H, H-3<sub>eq</sub>, H- $\alpha$ , H-4<sub>ax</sub>), 3.00 (dd,  $J = 14.3, 6.0$  Hz, 1H, H- $\alpha$ ), 3.14 (ddd,  $J = 12.5, 8.3, 4.5$  Hz, 1H, H-3<sub>ax</sub>), 3.64-3.68 (overlap, 1H, H-1), 3.85 (s, 3H, 6-OMe), 5.30-5.47 (brs, 2H, 7-, 4'-OH), 6.42 (s, 1H, H-8), 6.52 (s, 1H, H-5), 6.71 (d,  $J = 8.4$  Hz, 2H, H-2', 6'), 6.99 (d,  $J = 8.4$  Hz, 2H, H-3', 5'); FABMS  $m/z$  300.200 [M+H]<sup>+</sup>

(-)-*Reticuline*.  $[\alpha]^{25}_{\text{D}} -60.8$  ( $c$  0.04, CHCl<sub>3</sub>); <sup>1</sup>H-NMR (CDCl<sub>3</sub>, 600 MHz)  $\delta$  2.48 (s, 3H, N-CH<sub>3</sub>), 2.56 (dt,  $J = 16.1, 5.0$  Hz, 1H, H-4<sub>eq</sub>), 2.70-2.81 (m, 3H, H-3<sub>eq</sub>, H- $\alpha$ , H-4<sub>ax</sub>), 3.00 (dd,  $J = 14.3, 5.6$  Hz, 1H, H- $\alpha$ ), 3.16 (ddd,  $J = 14.9, 8.6, 5.0$  Hz, 1H, H-3<sub>ax</sub>), 3.66 (t,  $J = 5.6$  Hz, 1H, H-1), 3.85 (s, 3H, 6-OMe), 3.86 (s, 3H, 4'-OMe), 5.38 (s, 1H, 3'-OH or 5-OH), 5.53 (s, 1H, 3'-OH or 5-OH), 6.43 (s, 1H, H-8), 6.54 (s, 1H, H-5), 6.60 (dd,  $J = 8.1, 2.0$  Hz, 1H, H-6'), 6.74 (d,  $J = 8.1$  Hz, 1H, H-5'), 6.78 (d,  $J = 2.0$  Hz, 1H, H-2'); FABMS  $m/z$  330.217 [M+H]<sup>+</sup>
